# Supplementary material for: Characterization of Nme5-Like Gene/Protein from the Red Alga Chondrus Crispus
Source: Mar Drugs. 2019 Dec 21;18(1):13. doi: 10.3390/md18010013 (PMC7024210; doi:10.3390/md18010013)
Supplement: Supplementary file 1 [file marinedrugs-18-00013-s001.pdf]

A

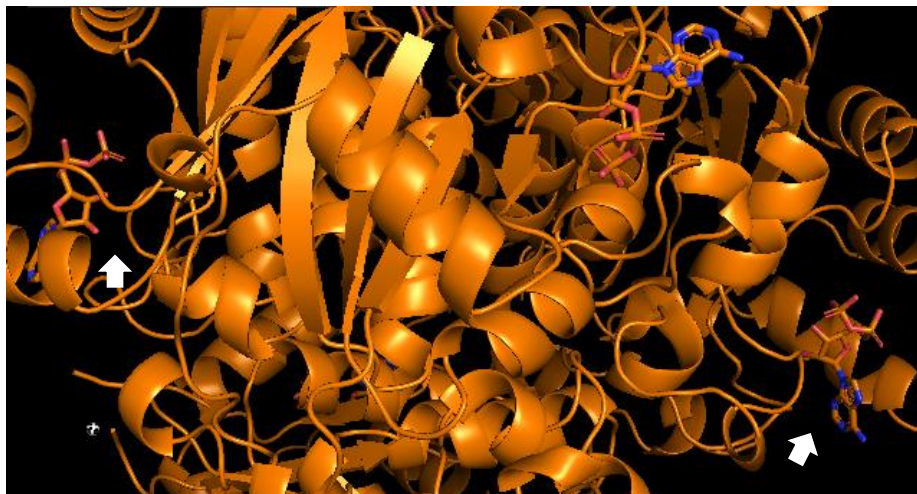

B

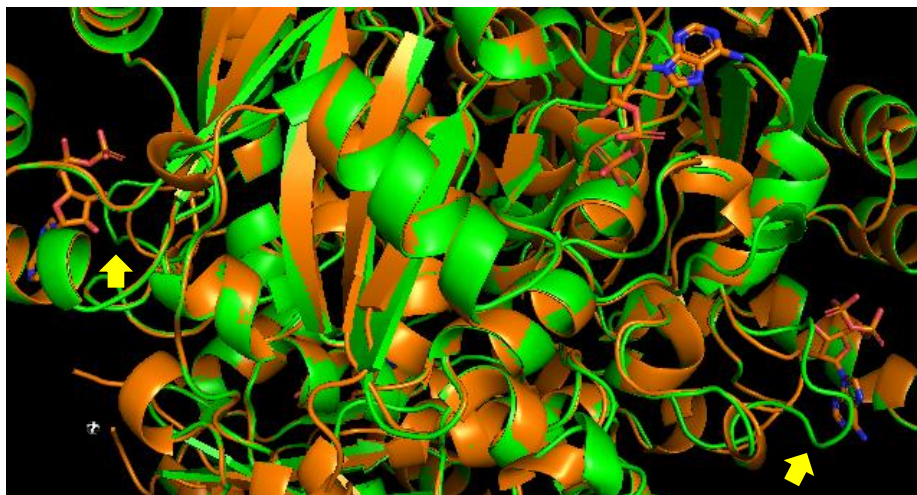

C

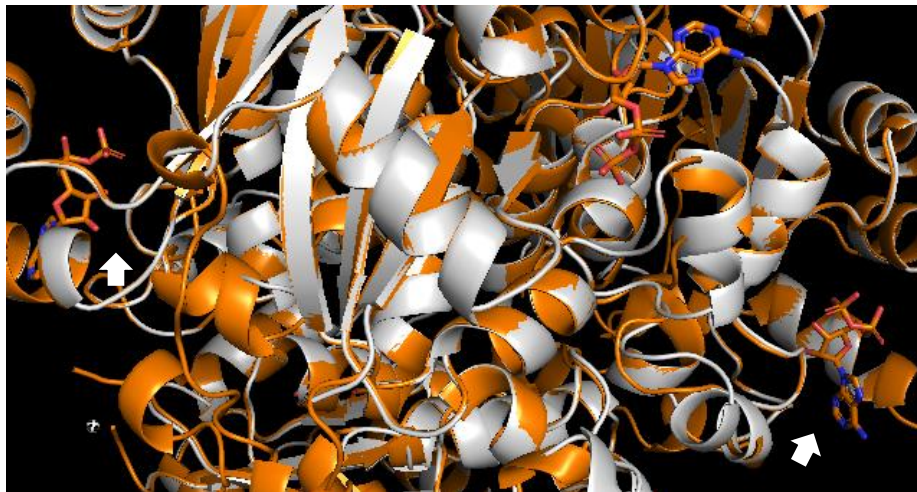

Figure S1. Crystal structure of human nucleoside diphosphate kinase A S120G complexed with ADP (PDBID: 2HVE1) (orange, A), overlaid with human Nme5 (green, B) or Nme5-likeCc (white, C). Arrows indicate the ADP-binding cavity. Note disturbances produced by 3 aa insertion in Kpn loop in human Nme5 indicated by yellow arrows.

Table S1. The percentage of identical amino acids and overall sequence similarity between NDPK domains

|        | Nme1Hs  | Nme2Hs  | Nme3Hs  | Nme4Hs  |
|--------|---------|---------|---------|---------|
| Nme5Hs | 29%/46% | 31%/49% | 29%/46% | 29%/48% |
| Nme5Cc | 31%/48% | 30%/51% | 31%/51% | 31%/48% |
